# Supplementary material for: EYS is a major gene involved in retinitis pigmentosa in Japan: genetic landscapes revealed by stepwise genetic screening
Source: PubMed Central journal article supplement (PMC7695703; doi:10.1038/s41598-020-77558-1), 2020-11-27

# ***EYS* is a major gene involved in retinitis pigmentosa in Japan: Genetic landscapes revealed by stepwise genetic screening**

Shogo Numa<sup>1</sup>, Akio Oishi<sup>2</sup>, Koichiro Higasa<sup>3</sup>, Maho Oishi<sup>1,4</sup>, Manabu Miyata<sup>1</sup>, Tomoko Hasegawa<sup>1</sup>, Hanako Ohashi Ikeda<sup>1</sup>, Yuki Otsuka<sup>1</sup>, Fumihiko Matsuda<sup>5</sup>, Akitaka Tsujikawa<sup>1</sup>

1 Department of Ophthalmology and Visual Sciences, Kyoto University Graduate School of Medicine, Kyoto, Japan

2 Department of Ophthalmology and Visual Sciences, Nagasaki University, Nagasaki, Japan

3 Department of Genome Analysis, Institute of Biomedical Science, Kansai Medical University, Osaka, Japan

4 Kyoto Okamoto Memorial Hospital, Kyoto, Japan

5 Center for Genomic Medicine, Kyoto University Graduate School of Medicine, Kyoto, Japan

Supplementary Table 1. Reference numbers of the analyzed genes.

Supplementary Table 2. Details of genetically solved patients and causative variants.

Supplementary Table 3. Details of causative variants.

Supplementary Table 4. Details of possibly solved patients, causative variants and VUS.

Supplementary Table 5. Details of candidate causative variants evaluated as VUS in the current study.

Supplementary Figure 1. Heterozygous deletion spanning exon 42 of *EYS*.

Supplementary Figure 2. Complex rearrangements including *PRPF31*.

Supplementary Figure 3. Atypical phenotype of patient possibly solved with VUS of *CNGA1*.

Supplementary Figure 4. Atypical phenotype of patient possibly solved with VUS of *GPR98*.

Supplementary Figure 5. Atypical phenotype of patient possibly solved with VUS of *CRB1*.

Supplementary Figure 6. Atypical phenotype of patient possibly solved with VUS of *CLN3*.

Supplementary Figure 7. Phenotype of the patient possibly solved with VUS of *GUCY2D*.

#### NOTICE :

The variants listed in Supplementary Table 4 and 5 need to be replicated in further ethnic-matched study for confirmation of pathogenicity before the patients are recruited to any available clinical trials of gene therapies.

Supplementary Table 1. Reference numbers of the analyzed genes.

| Gene            | NM number    | Gene            | NM number    | Gene           | NM number    | Gene            | NM number    |
|-----------------|--------------|-----------------|--------------|----------------|--------------|-----------------|--------------|
| <i>ABCA4</i>    | NM_000350    | <i>C1QTNF5</i>  | NM_015645    | <i>CNGA3</i>   | NM_001298    | <i>GUCY2D</i>   | NM_000180    |
| <i>ABHD12</i>   | NM_001042472 | <i>C21orf2</i>  | NM_004928    | <i>CNGB1</i>   | NM_001297    | <i>HARS</i>     | NM_002109    |
| <i>ADAM9</i>    | NM_003816    | <i>C2orf71</i>  | NM_001029883 | <i>CNGB3</i>   | NM_019098    | <i>HGSNAT</i>   | NM_152419    |
| <i>ADAMTS18</i> | NM_199355    | <i>C8orf37</i>  | NM_177965    | <i>CNNM4</i>   | NM_020184    | <i>HK1</i>      | NM_000188    |
| <i>AGBL5</i>    | NM_021831    | <i>CABP4</i>    | NM_145200    | <i>CRB1</i>    | NM_201253    | <i>HMCN1</i>    | NM_031935    |
| <i>AHI1</i>     | NM_017651    | <i>CACNA1F</i>  | NM_005183    | <i>CRX</i>     | NM_000554    | <i>HMX1</i>     | NM_018942    |
| <i>AHR</i>      | NM_001621    | <i>CACNA2D4</i> | NM_172364    | <i>CSPP1</i>   | NM_024790    | <i>IDH3B</i>    | NM_006899    |
| <i>AIPL1</i>    | NM_014336    | <i>CAPN5</i>    | NM_004055    | <i>CTNNA1</i>  | NM_001903    | <i>IFT140</i>   | NM_014714    |
| <i>ALMS1</i>    | NM_015120    | <i>CC2D2A</i>   | NM_001080522 | <i>CYP4V2</i>  | NM_207352    | <i>IFT172</i>   | NM_015662    |
| <i>ARHGEF18</i> | NM_001130955 | <i>CCT2</i>     | NM_006431    | <i>DFNB31</i>  | NM_015404    | <i>IFT27</i>    | NM_006860    |
| <i>ARL2BP</i>   | NM_012106    | <i>CDH23</i>    | NM_022124    | <i>DHDDS</i>   | NM_024887    | <i>IFT81</i>    | NM_014055    |
| <i>ARL3</i>     | NM_004311    | <i>CDH3</i>     | NM_001793    | <i>DHX38</i>   | NM_014003    | <i>IMPDH1</i>   | NM_000883    |
| <i>ARL6</i>     | NM_177976    | <i>CDHR1</i>    | NM_033100    | <i>DRAM2</i>   | NM_178454    | <i>IMPG1</i>    | NM_001563    |
| <i>ARSG</i>     | NM_014960    | <i>CEP19</i>    | NM_032898    | <i>ELOVL4</i>  | NM_022726    | <i>IMPG2</i>    | NM_016247    |
| <i>ATXN7</i>    | NM_000333    | <i>CEP250</i>   | NM_007186    | <i>ERCC6</i>   | NM_000124    | <i>INPP5E</i>   | NM_019892    |
| <i>BBIP1</i>    | NM_001195306 | <i>CEP290</i>   | NM_025114    | <i>ESPN</i>    | NM_031475    | <i>INVS</i>     | NM_014425    |
| <i>BBS1</i>     | NM_024649    | <i>CEP78</i>    | NM_001098802 | <i>EXOSC2</i>  | NM_014285    | <i>IQCB1</i>    | NM_001023570 |
| <i>BBS10</i>    | NM_024685    | <i>CERKL</i>    | NM_001030311 | <i>EYS</i>     | NM_001142800 | <i>ITM2B</i>    | NM_021999    |
| <i>BBS12</i>    | NM_152618    | <i>CHM</i>      | NM_000390    | <i>FAM161A</i> | NM_001201543 | <i>JAG1</i>     | NM_000214    |
| <i>BBS2</i>     | NM_031885    | <i>CIB2</i>     | NM_006383    | <i>FLVCR1</i>  | NM_014053    | <i>KCNJ13</i>   | NM_002242    |
| <i>BBS4</i>     | NM_033028    | <i>CLCC1</i>    | NM_001048210 | <i>GDF6</i>    | NM_001001557 | <i>KCNV2</i>    | NM_133497    |
| <i>BBS5</i>     | NM_152384    | <i>CLN3</i>     | NM_001042432 | <i>GNPTG</i>   | NM_032520    | <i>KIAA1549</i> | NM_001164665 |
| <i>BBS7</i>     | NM_176824    | <i>CLRN1</i>    | NM_174878    | <i>GPR98</i>   | NM_032119    | <i>KLHL7</i>    | NM_001031710 |
| <i>BBS9</i>     | NM_198428    | <i>CLUAP1</i>   | NM_015041    | <i>GPR125</i>  | NM_145290    | <i>LAMA1</i>    | NM_005559    |
| <i>BEST1</i>    | NM_004183    | <i>CNGA1</i>    | NM_000087    | <i>GUCA1A</i>  | NM_000409    | <i>LCA5</i>     | NM_181714    |

Supplementary Table 1. Reference numbers of the analyzed genes.

| Gene            | NM number    | Gene           | NM number    | Gene            | NM number    | Gene            | NM number    |
|-----------------|--------------|----------------|--------------|-----------------|--------------|-----------------|--------------|
| <i>LRAT</i>     | NM_004744    | <i>PANK2</i>   | NM_153638    | <i>PRPH2</i>    | NM_000322    | <i>SDCCAG8</i>  | NM_006642    |
| <i>LZTFL1</i>   | NM_020347    | <i>PCDH15</i>  | NM_033056    | <i>RAB28</i>    | NM_004249    | <i>SLC7A14</i>  | NM_020949    |
| <i>MAK</i>      | NM_001242957 | <i>PCYT1A</i>  | NM_005017    | <i>RAX2</i>     | NM_032753    | <i>SNRNP200</i> | NM_014014    |
| <i>MAPKAPK3</i> | NM_001243926 | <i>PDE6A</i>   | NM_000440    | <i>RBP3</i>     | NM_002900    | <i>SPARC</i>    | NM_003118    |
| <i>MERTK</i>    | NM_006343    | <i>PDE6B</i>   | NM_000283    | <i>RCBTB1</i>   | NM_018191    | <i>SPATA7</i>   | NM_018418    |
| <i>MFSD8</i>    | NM_152778    | <i>PDE6C</i>   | NM_006204    | <i>RD3</i>      | NM_183059    | <i>SPP2</i>     | NM_006944    |
| <i>MKKS</i>     | NM_018848    | <i>PEX1</i>    | NM_000466    | <i>RDH11</i>    | NM_016026    | <i>TMEM216</i>  | NM_001173990 |
| <i>MKS1</i>     | NM_017777    | <i>PEX2</i>    | NM_000318    | <i>RDH12</i>    | NM_152443    | <i>TMEM237</i>  | NM_001044385 |
| <i>MVK</i>      | NM_000431    | <i>PEX7</i>    | NM_000288    | <i>RDH5</i>     | NM_002905    | <i>TOPORS</i>   | NM_005802    |
| <i>MYO7A</i>    | NM_000260    | <i>PGK1</i>    | NM_000291    | <i>REEP6</i>    | NM_001329556 | <i>TRIM32</i>   | NM_012210    |
| <i>NBAS</i>     | NM_015909    | <i>PHYH</i>    | NM_006214    | <i>RGR</i>      | NM_001012720 | <i>TRNT1</i>    | NM_182916    |
| <i>NEK2</i>     | NM_002497    | <i>PNPLA6</i>  | NM_006702    | <i>RHO</i>      | NM_000539    | <i>TTC8</i>     | NM_198309    |
| <i>NEUROD1</i>  | NM_002500    | <i>POC1B</i>   | NM_172240    | <i>RLBP1</i>    | NM_000326    | <i>TLL5</i>     | NM_015072    |
| <i>NMNAT1</i>   | NM_022787    | <i>POC5</i>    | NM_001099271 | <i>RP1</i>      | NM_006269    | <i>TTPA</i>     | NM_000370    |
| <i>NPHP1</i>    | NM_000272    | <i>POMGNT1</i> | NM_017739    | <i>RP1L1</i>    | NM_178857    | <i>TUB</i>      | NM_003320    |
| <i>NPHP3</i>    | NM_153240    | <i>PRCD</i>    | NM_001077620 | <i>RP2</i>      | NM_006915    | <i>TULP1</i>    | NM_003322    |
| <i>NPHP4</i>    | NM_015102    | <i>PRDM13</i>  | NM_021620    | <i>RP9</i>      | NM_203288    | <i>USH1C</i>    | NM_005709    |
| <i>NR2E3</i>    | NM_014249    | <i>PROM1</i>   | NM_006017    | <i>RPE65</i>    | NM_000329    | <i>USH1G</i>    | NM_173477    |
| <i>OAT</i>      | NM_000274    | <i>PRPF3</i>   | NM_004698    | <i>RPGR</i>     | NM_000328    | <i>USH2A</i>    | NM_206933    |
| <i>OFD1</i>     | NM_003611    | <i>PRPF31</i>  | NM_015629    | <i>RPGRIP1</i>  | NM_020366    | <i>WDPCP</i>    | NM_015910    |
| <i>OPN1LW</i>   | NM_020061    | <i>PRPF4</i>   | NM_004697    | <i>RPGRIP1L</i> | NM_015272    | <i>ZNF408</i>   | NM_024741    |
| <i>OPN1SW</i>   | NM_001708    | <i>PRPF6</i>   | NM_012469    | <i>SAG</i>      | NM_000541    | <i>ZNF423</i>   | NM_015069    |
| <i>OTX2</i>     | NM_172337    | <i>PRPF8</i>   | NM_006445    | <i>SAMD11</i>   | NM_152486    | <i>ZNF513</i>   | NM_144631    |

# Supplementary Table 2. Details of genetically solved patients and causative variants.

| SampleID | Sex | Age of onset       | First subjective symptom       | Age of first visit to our institute | VA at first visit to our institute | Hereditary trait indicated from pedigree tree | Gene          | Genotype        | Variant 1                     | Variant 2                     | Variant 3            | Comment on phenotype                     |
|----------|-----|--------------------|--------------------------------|-------------------------------------|------------------------------------|-----------------------------------------------|---------------|-----------------|-------------------------------|-------------------------------|----------------------|------------------------------------------|
| RPKT0332 | M   | 46                 | constriction of VF             | 46                                  | 1.2/1.0                            | inconclusive                                  | <i>EYS</i>    | compound hetero | c.2528G>A:p.G843E             | c.8860T>C:p.F2954L            | -                    | combined with NTG                        |
| RPKT0334 | M   | childhood          | night blindness                | 41                                  | 0.7/0.8                            | inconclusive                                  | <i>EYS</i>    | homo            | c.2528G>A:p.G843E             | c.2528G>A:p.G843E             | -                    | combined with granular corneal dystrophy |
| RPKT0341 | F   | childhood          | p/o at occasional medical exam | 35                                  | 0.4/0.3                            | sporadic                                      | <i>EYS</i>    | compound hetero | c.3809T>G:p.V1270G            | c.4957dupA:p.S1653fs          | c.8268delC:p.S2756fs | n.p.                                     |
| RPKT0351 | M   | 43                 | night blindness                | 57                                  | 0.6/0.6                            | AR                                            | <i>EYS</i>    | compound hetero | c.2528G>A:p.G843E             | c.4957dupA:p.S1653fs          | -                    | n.p.                                     |
| RPKT0358 | M   | childhood          | decreased VA                   | 26                                  | 0.6/0.9                            | sporadic                                      | <i>PDE6B</i>  | compound hetero | c.1768delA:p.M590fs           | c.1920+2T>C:p.?               | -                    | n.p.                                     |
| RPKT0359 | F   | 29                 | decreased VA                   | 51                                  | 0.4/1.0                            | AR                                            | <i>EYS</i>    | homo            | c.6557G>A:p.G2186E            | c.6557G>A:p.G2186E            | -                    | n.p.                                     |
| RPKT0360 | M   | not recorded       | night blindness                | 59                                  | 0.04/0.8                           | AR                                            | <i>CNGA1</i>  | homo            | c.265delC:p.L89fs             | c.265delC:p.L89fs             | -                    | n.p.                                     |
| RPKT0362 | F   | 41                 | night blindness                | 46                                  | 1.2/1.2                            | AR                                            | <i>EYS</i>    | compound hetero | c.4957dupA:p.S1653fs          | c.8805C>A:p.Y2935X            | -                    | n.p.                                     |
| RPKT0364 | M   | not recorded       | not recorded                   | 58                                  | 0.1/0.7                            | AR                                            | <i>EYS</i>    | homo            | c.4957dupA:p.S1653fs          | c.4957dupA:p.S1653fs          | -                    | n.p.                                     |
| RPKT0370 | M   | 44                 | p/o at occasional medical exam | 59                                  | 0.8/0.6                            | AR                                            | <i>EYS</i>    | compound hetero | c.1750G>T:p.E584X             | c.2528G>A:p.G843E             | -                    | n.p.                                     |
| RPKT0372 | F   | childhood          | night blindness                | 26                                  | 0.6/0.7                            | AR                                            | <i>EYS</i>    | homo            | c.4957dupA:p.S1653fs          | c.4957dupA:p.S1653fs          | -                    | n.p.                                     |
| RPKT0377 | M   | 30                 | night blindness                | 58                                  | 0.6/0.7                            | sporadic                                      | <i>EYS</i>    | homo            | c.7919G>A:p.W2640X            | c.7919G>A:p.W2640X            | -                    | n.p.                                     |
| RPKT0380 | F   | in her 5th decades | constriction of VF             | 53                                  | 1.5/1.2                            | sporadic                                      | <i>RP11</i>   | homo            | c.3026_3029del:p.1009_1010del | c.3026_3029del:p.1009_1010del | -                    | n.p.                                     |
| RPKT0382 | M   | adolescence        | night blindness                | 63                                  | 0.7/0.6                            | inconclusive                                  | <i>PDE6B</i>  | homo            | c.1669C>T:p.H557Y             | c.1669C>T:p.H557Y             | -                    | n.p.                                     |
| RPKT0399 | M   | childhood          | night blindness                | 63                                  | 0.06/0.05                          | sporadic                                      | <i>RPE65</i>  | homo            | c.1543C>T:p.R515W             | c.1543C>T:p.R515W             | -                    | n.p.                                     |
| RPKT0401 | F   | 34                 | night blindness                | 54                                  | 0.2/0.2                            | AR                                            | <i>USH2A</i>  | compound hetero | c.490G>T:p.V164F              | c.13010C>T:p.T4337M           | -                    | n.p.                                     |
| RPKT0404 | F   | 31                 | color vision deficiency        | 31                                  | 1.5/1.5                            | AR                                            | <i>USH2A</i>  | homo            | c.8254G>A:p.G2752R            | c.8254G>A:p.G2752R            | -                    | n.p.                                     |
| RPKT0406 | F   | 53                 | p/o at occasional medical exam | 63                                  | 0.7/1.5                            | sporadic                                      | <i>RHO</i>    | hetero          | c.302G>A:p.G101E              | -                             | -                    | n.p.                                     |
| RPKT0409 | F   | 40                 | night blindness                | 58                                  | 0.1/0.1                            | AR                                            | <i>EYS</i>    | homo            | c.7919G>A:p.W2640X            | c.7919G>A:p.W2640X            | -                    | n.p.                                     |
| RPKT0411 | M   | childhood          | night blindness                | 8                                   | 1.5/1.5                            | sporadic                                      | <i>PDE6B</i>  | compound hetero | c.1604T>A:p.I535N             | c.1669C>T:p.H557Y             | -                    | n.p.                                     |
| RPKT0413 | F   | 40                 | p/o at occasional medical exam | 41                                  | 1.5/1.5                            | sporadic                                      | <i>EYS</i>    | homo            | c.2528G>A:p.G843E             | c.2528G>A:p.G843E             | -                    | n.p.                                     |
| RPKT0418 | M   | 44                 | night blindness                | 51                                  | 0.2/0.1                            | sporadic                                      | <i>EYS</i>    | compound hetero | c.2528G>A:p.G843E             | c.8805C>A:p.Y2935X            | -                    | n.p.                                     |
| RPKT0423 | F   | childhood          | night blindness                | 63                                  | SL+ /HM                            | sporadic                                      | <i>EYS</i>    | homo            | c.4957dupA:p.S1653fs          | c.4957dupA:p.S1653fs          | -                    | n.p.                                     |
| RPKT0437 | M   | 15                 | night blindness                | 22                                  | 1.0/1.0                            | sporadic                                      | <i>EYS</i>    | compound hetero | c.2528G>A:p.G843E             | c.6557G>A:p.G2186E            | -                    | n.p.                                     |
| RPKT0439 | F   | childhood          | night blindness                | 60                                  | 0.04/HM                            | AR                                            | <i>PDE6B</i>  | homo            | c.1604T>A:p.I535N             | c.1604T>A:p.I535N             | -                    | n.p.                                     |
| RPKT0440 | F   | childhood          | night blindness                | 29                                  | 1.0/0.9                            | sporadic                                      | <i>PDE6A</i>  | homo            | c.166G>T:p.E56X               | c.166G>T:p.E56X               | -                    | n.p.                                     |
| RPKT0442 | M   | 30                 | night blindness                | 42                                  | 1.5/1.5                            | sporadic                                      | <i>PRPF31</i> | hetero          | c.316G>T:p.E106X              | -                             | -                    | n.p.                                     |
| RPKT0444 | M   | childhood          | night blindness                | 33                                  | 0.7/1.0                            | sporadic                                      | <i>EYS</i>    | compound hetero | c.6557G>A:p.G2186E            | c.8650T>C:p.C2884R            | -                    | n.p.                                     |
| RPKT0453 | M   | 70                 | decreased VA                   | 89                                  | 0.6/0.5                            | sporadic                                      | <i>EYS</i>    | compound hetero | c.2528G>A:p.G843E             | c.8805C>A:p.Y2935X            | -                    | n.p.                                     |
| RPKT0456 | M   | childhood          | night blindness                | 53                                  | 0.02/0.2                           | inconclusive                                  | <i>RPGR</i>   | hemi            | c.793dupA:p.T265fs            | -                             | -                    | n.p.                                     |
| RPKT0461 | M   | 6                  | decreased VA                   | 26                                  | 0.6/0.6                            | sporadic                                      | <i>RPGR</i>   | hemi            | c.2236_2237del:p.746_746del   | -                             | -                    | n.p.                                     |
| RPKT0462 | M   | in his 4th decades | night blindness                | 45                                  | 1.0/1.2                            | sporadic                                      | <i>USH2A</i>  | compound hetero | c.2802T>G:p.C934W             | c.9799T>C:p.C3267R            | -                    | n.p.                                     |
| RPKT0467 | F   | 20                 | decreased VA                   | 52                                  | SL+ /SL+                           | AR                                            | <i>RP1</i>    | homo*           | c.4196delG:p.C1399fs          | c.6353G>A:p.S2118N            | -                    | n.p.                                     |
| RPKT0472 | M   | childhood          | night blindness                | 21                                  | 0.7/0.9                            | XL                                            | <i>RPGR</i>   | hemi            | c.1665delA:p.E555fs           | -                             | -                    | n.p.                                     |
| RPKT0473 | F   | 42                 | night blindness                | 44                                  | 0.8/0.9                            | sporadic                                      | <i>USH2A</i>  | compound hetero | c.2802T>G:p.C934W             | c.7660C>T:p.Q2554X            | -                    | n.p.                                     |
| RPKT0474 | M   | childhood          | night blindness                | 18                                  | 0.4/0.6                            | AR                                            | <i>RP1</i>    | homo            | c.4052_4053ins328             | c.4052_4053ins328             | -                    | n.p.                                     |
| RPKT0477 | M   | 38                 | night blindness                | 38                                  | 1.0/1.2                            | inconclusive                                  | <i>RPGR</i>   | hemi            | c.764C>T:p.T255I              | -                             | -                    | n.p.                                     |
| RPKT0478 | M   | childhood          | night blindness                | 24                                  | 0.04/0.04                          | sporadic                                      | <i>RP1</i>    | compound hetero | c.4052_4053ins328             | c.4196delG:p.C1399fs          | c.6353G>A:p.S2118N   | n.p.                                     |
| RPKT0479 | F   | 20                 | night blindness                | 47                                  | 0.5/0.6                            | AR                                            | <i>EYS</i>    | homo            | c.2528G>A:p.G843E             | c.2528G>A:p.G843E             | -                    | n.p.                                     |
| RPKT0481 | F   | 58                 | p/o at occasional medical exam | 58                                  | 0.9/1.0                            | sporadic                                      | <i>EYS</i>    | homo            | c.6557G>A:p.G2186E            | c.6557G>A:p.G2186E            | -                    | combined with PACS                       |
| RPKT0482 | M   | 44                 | decreased VA                   | 44                                  | 0.03/0.01                          | AD                                            | <i>PRPF8</i>  | hetero          | c.5792C>T:p.T1931M            | -                             | -                    | n.p.                                     |
| RPKT0485 | F   | in her 5th decades | night blindness                | 63                                  | 0.02/0.06                          | AR                                            | <i>USH2A</i>  | homo            | c.10859T>C:p.I3620T           | c.10859T>C:p.I3620T           | -                    | n.p.                                     |
| RPKT0487 | F   | childhood          | night blindness                | 29                                  | 0.3/0.5                            | sporadic                                      | <i>RP1</i>    | compound hetero | c.4052_4053ins328             | c.5797C>T:p.R1933X            | -                    | n.p.                                     |
| RPKT0490 | F   | 39                 | night blindness                | 41                                  | 0.4/1.0                            | sporadic                                      | <i>EYS</i>    | compound hetero | c.2528G>A:p.G843E             | c.4957dupA:p.S1653fs          | -                    | n.p.                                     |
| RPKT0492 | M   | 41                 | p/o at occasional medical exam | 59                                  | HM/0.02                            | sporadic                                      | <i>EYS</i>    | compound hetero | c.2528G>A:p.G843E             | c.4957dupA:p.S1653fs          | -                    | combined with NTG                        |
| RPKT0495 | M   | childhood          | night blindness                | 54                                  | 0.8/0.6                            | AR                                            | <i>CNGA1</i>  | compound hetero | c.191delG:p.G64fs             | c.265delC:p.L89fs             | -                    | n.p.                                     |
| RPKT0496 | F   | childhood          | night blindness                | 61                                  | 0.02/HM                            | AR                                            | <i>CNGA1</i>  | homo            | c.265delC:p.L89fs             | c.265delC:p.L89fs             | -                    | n.p.                                     |
| RPKT0499 | F   | childhood          | night blindness                | 10                                  | 1.2/1.2                            | sporadic                                      | <i>PDE6B</i>  | compound hetero | c.1486delC:p.P496fs           | c.1604T>A:p.I535N             | -                    | n.p.                                     |

NTG: normal tension glaucoma, PACS: primary angle closure syndrome, n.p.: nothing particular, p/o: pointed out, RD: retinal detachment, VF: visual field

\*RPKT0467 was homozygous for two variants c.4196delG and c.6353G>A. \*\*Gross deletion shown in Supplementary Figure1

\*\*\*Complex rearrangement comprising gross deletion shown in Supplementary Figure2

# Supplementary Table 2. Details of genetically solved patients and causative variants.

|          |   |                    |                                |    |           |              |                 |                 |                                          |                                   |                   |                                               |
|----------|---|--------------------|--------------------------------|----|-----------|--------------|-----------------|-----------------|------------------------------------------|-----------------------------------|-------------------|-----------------------------------------------|
| RPKT0501 | F | 30                 | photophobia                    | 31 | 1.2/0.9   | sporadic     | <i>EYS</i>      | compound hetero | c.2528G>A:p.G843E                        | c.8805C>A:p.Y2935X                | -                 | n.p.                                          |
| RPKT0507 | F | 46                 | photophobia                    | 70 | 0.9/0.7   | sporadic     | <i>EYS</i>      | compound hetero | c.3489T>A:p.N1163K                       | c.3809T>G:p.V1270G                | -                 | combined with NTG                             |
| RPKT0514 | M | 10                 | night blindness                | 11 | 1.2/1.2   | sporadic     | <i>PRPF8</i>    | hetero          | c.6926A>C:p.H2309P                       | -                                 | -                 | n.p.                                          |
| RPKT0516 | M | adolescence        | night blindness                | 66 | SL+/SL+   | sporadic     | <i>EYS</i>      | homo            | c.2528G>A:p.G843E                        | c.2528G>A:p.G843E                 | -                 | n.p.                                          |
| RPKT0517 | M | in her 5th decades | decreased VA                   | 66 | 0.5/0.3   | AR           | <i>USH2A</i>    | homo            | c.10859T>C:p.I3620T                      | c.10859T>C:p.I3620T               | -                 | n.p.                                          |
| RPKT0521 | F | adolescence        | night blindness                | 24 | 1.0/0.6   | sporadic     | <i>RPI</i>      | homo            | c.4052_4053ins328                        | c.4052_4053ins328                 | -                 | n.p.                                          |
| RPKT0522 | F | childhood          | night blindness                | 58 | 0.8/0.7   | sporadic     | <i>CNGAI</i>    | compound hetero | c.191delG:p.G64fs                        | c.265delC:p.L89fs                 | -                 | n.p.                                          |
| RPKT0523 | M | 54                 | night blindness                | 60 | 0.2/0.1   | AR           | <i>PDE6B</i>    | homo            | c.51delT:p.D17fs                         | c.51delT:p.D17fs                  | -                 | n.p.                                          |
| RPKT0525 | F | 58                 | night blindness                | 60 | 1.0/1.2   | sporadic     | <i>EYS</i>      | compound hetero | c.2528G>A:p.G843E                        | c.2886C>G:p.F962L                 | c.2892A>C:p.E964D | n.p.                                          |
| RPKT0527 | M | childhood          | night blindness                | 10 | 0.9/0.9   | AR           | <i>RPGR</i>     | hemi            | c.2236_2237del:p.746_746del              | -                                 | -                 | n.p.                                          |
| RPKT0528 | M | 35                 | p/o at occasional medical exam | 35 | 1.5/1.5   | sporadic     | <i>EYS</i>      | compound hetero | c.4957dupA:p.S1653fs                     | gross deletion including exon42** | -                 | n.p.                                          |
| RPKT0534 | M | 20                 | night blindness                | 59 | 0.5/0.4   | AR           | <i>EYS</i>      | compound hetero | c.4897A>G:p.K1633E                       | c.7609G>A:p.A2537T                | -                 | n.p.                                          |
| RPKT0535 | F | adolescence        | night blindness                | 29 | 1.2/1.5   | sporadic     | <i>EYS</i>      | compound hetero | c.2528G>A:p.G843E                        | c.4957dupA:p.S1653fs              | -                 | n.p.                                          |
| RPKT0537 | M | adolescence        | night blindness                | 39 | 0.7/0.7   | sporadic     | <i>RP1L1</i>    | homo            | c.324_325insT:p.P109fs                   | c.324_325insT:p.P109fs            | -                 | n.p.                                          |
| RPKT0539 | M | 52                 | decreased VA                   | 52 | 0.6/1.2   | sporadic     | <i>EYS</i>      | compound hetero | c.2528G>A:p.G843E                        | c.7919G>A:p.W2640X                | -                 | n.p.                                          |
| RPKT0541 | M | 27                 | p/o at occasional medical exam | 39 | 1.5/1.5   | sporadic     | <i>EYS</i>      | compound hetero | c.2528G>A:p.G843E                        | c.4957dupA:p.S1653fs              | -                 | n.p.                                          |
| RPKT0544 | M | in his 3rd decades | decreased VA                   | 31 | 0.9/0.8   | sporadic     | <i>EYS</i>      | compound hetero | c.2528G>A:p.G843E                        | c.7665_7666del:p.2555_2556del     | -                 | combined with left eye interstitial keratitis |
| RPKT0549 | M | childhood          | night blindness                | 66 | 0.9/0.7   | sporadic     | <i>CNGAI</i>    | homo            | c.191delG:p.G64fs                        | c.191delG:p.G64fs                 | -                 | n.p.                                          |
| RPKT0552 | F | childhood          | night blindness                | 9  | 1.5/1.5   | sporadic     | <i>EYS</i>      | compound hetero | c.2380C>T:p.R794X                        | c.8268_8272del:p.2756_2758del     | -                 | n.p.                                          |
| RPKT0557 | M | 30                 | night blindness                | 62 | SL+/SL+   | sporadic     | <i>EYS</i>      | compound hetero | c.2528G>A:p.G843E                        | c.4957dupA:p.S1653fs              | -                 | n.p.                                          |
| RPKT0559 | F | childhood          | night blindness                | 55 | 0.2/0.4   | AR           | <i>EYS</i>      | homo            | c.7919G>A:p.W2640X                       | c.7919G>A:p.W2640X                | -                 | n.p.                                          |
| RPKT0560 | F | 68                 | night blindness                | 71 | 0.3/0.2   | AR           | <i>EYS</i>      | compound hetero | c.6557G>A:p.G2186E                       | c.8805C>A:p.Y2935X                | -                 | combined with NTG                             |
| RPKT0561 | M | adolescence        | constriction of VF             | 19 | 1.5/0.9   | sporadic     | <i>EYS</i>      | compound hetero | c.4957dupA:p.S1653fs                     | c.8805C>A:p.Y2935X                | -                 | n.p.                                          |
| RPKT0570 | M | 20                 | night blindness                | 57 | 1.0/0.9   | AR           | <i>EYS</i>      | compound hetero | c.4957dupA:p.S1653fs                     | c.5847C>A:p.Y1949X                | -                 | n.p.                                          |
| RPKT0575 | M | childhood          | night blindness                | 13 | 0.1/0.1   | XL           | <i>RP2</i>      | hemi            | c.28A>T:p.K10X                           | -                                 | -                 | n.p.                                          |
| RPKT0576 | M | in his 3rd decades | night blindness                | 58 | 0.07/0.3  | AR           | <i>USH2A</i>    | compound hetero | c.10859T>C:p.I3620T                      | c.12168G>A:p.W4056X               | -                 | n.p.                                          |
| RPKT0578 | M | 4                  | night blindness                | 5  | 0.3/0.3   | sporadic     | <i>RPI</i>      | homo            | c.4052_4053ins328                        | c.4052_4053ins328                 | -                 | n.p.                                          |
| RPKT0579 | F | childhood          | night blindness                | 63 | 0.3/0.3   | sporadic     | <i>EYS</i>      | compound hetero | c.4957dupA:p.S1653fs                     | c.7613delC:p.P2538fs              | -                 | n.p.                                          |
| RPKT0581 | M | 30                 | night blindness                | 44 | 1.2/1.2   | sporadic     | <i>EYS</i>      | compound hetero | c.2528G>A:p.G843E                        | c.7919G>A:p.W2640X                | -                 | n.p.                                          |
| RPKT0585 | M | 20                 | night blindness                | 61 | 0.5/0.4   | sporadic     | <i>SAG</i>      | homo            | c.924delA:p.T308fs                       | c.924delA:p.T308fs                | -                 | n.p.                                          |
| RPKT0591 | M | childhood          | night blindness                | 67 | SL-/0.06  | XL           | <i>RPGR</i>     | hemi            | c.2357_2358insGAGGAGAA:p.K786fs          | -                                 | -                 | combined with right eye RD                    |
| RPKT0593 | M | 50                 | decreased VA                   | 76 | 0.3/0.15  | AD           | <i>SNRNP200</i> | hetero          | c.3260C>T:p.S1087L                       | -                                 | -                 | n.p.                                          |
| RPKT0598 | M | 33                 | night blindness                | 81 | HM/SL+    | AR           | <i>EYS</i>      | homo            | c.8805C>A:p.Y2935X                       | c.8805C>A:p.Y2935X                | -                 | n.p.                                          |
| RPKT0599 | F | 19                 | night blindness                | 54 | 0.2/0.2   | AR           | <i>EYS</i>      | compound hetero | c.2528G>A:p.G843E                        | c.4957dupA:p.S1653fs              | -                 | n.p.                                          |
| RPKT0600 | F | childhood          | night blindness                | 36 | 0.9/1.0   | sporadic     | <i>EYS</i>      | compound hetero | c.4957dupA:p.S1653fs                     | c.6557G>A:p.G2186E                | -                 | n.p.                                          |
| RPKT0602 | M | 67                 | night blindness                | 78 | 0.6/0.5   | inconclusive | <i>RPI</i>      | hetero          | c.2143C>T:p.Q715X                        | -                                 | -                 | n.p.                                          |
| RPKT0603 | M | childhood          | night blindness                | 45 | 0.06/0.15 | AR           | <i>PRPF8</i>    | hetero          | c.6929G>A:p.R2310K                       | -                                 | -                 | n.p.                                          |
| RPKT0606 | M | 11                 | night blindness                | 58 | 0.03/0.1  | AD           | <i>PRPF31</i>   | hetero          | Gross deletion including exon 2 and 3*** | -                                 | -                 | n.p.                                          |
| RPKT0613 | F | adolescence        | night blindness                | 27 | 1.2/1.2   | sporadic     | <i>EYS</i>      | homo            | c.2528G>A:p.G843E                        | c.2528G>A:p.G843E                 | -                 | n.p.                                          |
| RPKT0620 | M | adolescence        | night blindness                | 44 | 0.05/0.01 | inconclusive | <i>EYS</i>      | compound hetero | c.4957dupA:p.S1653fs                     | c.8805C>A:p.Y2935X                | -                 | n.p.                                          |
| RPKT0626 | M | 30                 | night blindness                | 35 | 1.5/1.5   | sporadic     | <i>EYS</i>      | compound hetero | c.2528G>A:p.G843E                        | c.4957dupA:p.S1653fs              | -                 | n.p.                                          |
| RPKT0628 | F | 30                 | constriction of VF             | 32 | 1.0/1.0   | sporadic     | <i>EYS</i>      | compound hetero | c.4957dupA:p.S1653fs                     | c.6557G>A:p.G2186E                | -                 | n.p.                                          |
| RPKT0630 | F | 24                 | constriction of VF             | 26 | 1.5/1.5   | sporadic     | <i>EYS</i>      | homo            | c.2528G>A:p.G843E                        | c.2528G>A:p.G843E                 | -                 | n.p.                                          |
| RPKT0633 | M | childhood          | night blindness                | 24 | 1.0/1.2   | inconclusive | <i>REEP6</i>    | compound hetero | c.230_233del:p.77_78del                  | c.280_281del:p.94_94del           | -                 | n.p.                                          |
| RPKT0636 | M | childhood          | night blindness                | 39 | 0.5/0.4   | XL           | <i>RPGR</i>     | hemi            | c.2706_2707del:p.902_903del              | -                                 | -                 | n.p.                                          |
| RPKT0639 | F | adolescence        | decreased VA                   | 70 | SL-/SL+   | sporadic     | <i>CERKL</i>    | homo            | c.638dupT:p.L213fs                       | c.638dupT:p.L213fs                | -                 | n.p.                                          |
| RPKT0640 | M | 6                  | decreased VA                   | 11 | 0.4/0.4   | AR           | <i>TULP1</i>    | homo            | c.1145T>C:p.F382S                        | c.1145T>C:p.F382S                 | -                 | n.p.                                          |
| RPKT0641 | M | 27                 | night blindness                | 27 | 1.2/1.5   | sporadic     | <i>EYS</i>      | homo            | c.8805C>A:p.Y2935X                       | c.8805C>A:p.Y2935X                | -                 | n.p.                                          |
| RPKT0644 | F | 44                 | night blindness                | 46 | 1.5/1.5   | sporadic     | <i>EYS</i>      | compound hetero | c.2528G>A:p.G843E                        | c.8805C>A:p.Y2935X                | -                 | n.p.                                          |
| RPKT0649 | M | 57                 | decreased VA                   | 60 | 0.6/0.6   | AR           | <i>EYS</i>      | compound hetero | c.4957dupA:p.S1653fs                     | c.6557G>A:p.G2186E                | -                 | n.p.                                          |

NTG: normal tension glaucoma, PACS: primary angle closure syndrome, n.p.: nothing particular, p/o: pointed out, RD: retinal detachment, VF: visual field

\*RPKT0467 was homozygous for two variants c.4196delG and c.6353G>A. \*\*Gross deletion shown in Supplementary Figure1

\*\*\*Complex rearrangement comprising gross deletion shown in Supplementary Figure2

# Supplementary Table 3. Details of causative variants.

| Chr. | Gene            | Exon                                       | Nucleotide change                            | Protein change | rsID         | Variant type   | MAF in databases |        |        | No. of damaging prediction | Satisfied criteria                  |
|------|-----------------|--------------------------------------------|----------------------------------------------|----------------|--------------|----------------|------------------|--------|--------|----------------------------|-------------------------------------|
|      |                 |                                            |                                              |                |              |                | gnomAD           | 1000G  | HGVD   |                            |                                     |
| 1    | <i>RPE65</i>    | 14                                         | c.1543C>T                                    | p.R515W        | rs121917745  | missense       | <0.0001          | NA     | NA     | 5/5                        | "DM" in HGMD                        |
| 1    | <i>USH2A</i>    | 3                                          | c.490G>T                                     | p.V164F        | rs527236123  | missense       | NA               | NA     | NA     | 4/5                        | "DM" in HGMD                        |
| 1    | <i>USH2A</i>    | 13                                         | c.2802T>G                                    | p.Q934W        | rs201527682  | missense       | 0.0002           | 0.0008 | 0.0008 | 5/5                        | "DM" in HGMD                        |
| 1    | <i>USH2A</i>    | 41                                         | c.7660C>T                                    | p.Q2554X       | -            | stopgain       | NA               | NA     | NA     | NA                         | likely pathogenic in ACMG guideline |
| 1    | <i>USH2A</i>    | 42                                         | c.8254G>A                                    | p.G2752R       | rs201863550  | missense       | <0.0001          | 0.0004 | NA     | 5/5                        | "DM" in HGMD                        |
| 1    | <i>USH2A</i>    | 50                                         | c.9799T>C                                    | p.C3267R       | rs111033263  | missense       | <0.0001          | NA     | NA     | 5/5                        | "DM" in HGMD                        |
| 1    | <i>USH2A</i>    | 55                                         | c.10859T>C                                   | p.I3620T       | rs779716464  | missense       | <0.0001          | NA     | 0.0004 | 5/5                        | "DM" in HGMD                        |
| 1    | <i>USH2A</i>    | 62                                         | c.121094G>A                                  | p.G4032R       | rs908265742  | missense       | <0.0001          | NA     | NA     | 5/5                        | "DM" in HGMD                        |
| 1    | <i>USH2A</i>    | 62                                         | c.121168G>A                                  | p.W4056X       | rs527236137  | stopgain       | <0.0001          | NA     | NA     | NA                         | likely pathogenic in ACMG guideline |
| 1    | <i>USH2A</i>    | 63                                         | c.13010C>T                                   | p.T4337M       | rs527236124  | missense       | NA               | NA     | 0.0004 | 4/5                        | "DM" in HGMD                        |
| 1    | <i>USH2A</i>    | 64                                         | c.13847G>T                                   | p.G4616V       | rs527236124  | missense       | NA               | NA     | NA     | 5/5                        | "DM" in HGMD                        |
| 2    | <i>SNRNP200</i> | 25                                         | c.32600C>T                                   | p.S1087L       | rs676070777  | missense       | <0.0001          | NA     | NA     | 5/5                        | "DM" in HGMD                        |
| 2    | <i>CERKL</i>    | 4                                          | c.638dupT                                    | p.L213fs       | -            | fs_ins         | NA               | NA     | NA     | NA                         | pathogenic in ACMG guideline        |
| 3    | <i>SAG</i>      | 11                                         | c.924deA                                     | p.T308fs       | -            | fs_del         | NA               | NA     | 0.0027 | NA                         | likely pathogenic in ACMG guideline |
| 3    | <i>RHO</i>      | 1                                          | c.302G>A                                     | p.G101E        | rs759945007  | missense       | <0.0001          | NA     | NA     | 5/5                        | "DM" in HGMD                        |
| 4    | <i>PDE6B</i>    | 1                                          | c.51delT                                     | p.D17fs        | rs758852173  | fs_del         | NA               | NA     | NA     | NA                         | likely pathogenic in ACMG guideline |
| 4    | <i>PDE6B</i>    | 12                                         | c.1486delC                                   | p.P496fs       | -            | fs_del         | NA               | NA     | NA     | NA                         | likely pathogenic in ACMG guideline |
| 4    | <i>PDE6B</i>    | 12                                         | c.1604T>A                                    | p.I555N        | rs527236088  | missense       | <0.0001          | NA     | 0.0009 | 4/5                        | "DM" in HGMD                        |
| 4    | <i>PDE6B</i>    | 13                                         | c.1669C>T                                    | p.H57Y         | rs121918581  | missense       | <0.0001          | NA     | 0.0004 | 5/5                        | "DM" in HGMD                        |
| 4    | <i>PDE6B</i>    | 14                                         | c.1768delA                                   | p.M590fs       | -            | fs_del         | NA               | NA     | NA     | NA                         | likely pathogenic in ACMG guideline |
| 4    | <i>PDE6B</i>    | intron15                                   | c.1920+2T>C                                  | p.?            | rs763996159  | spliceite      | <0.0001          | NA     | NA     | NA                         | "DM" in HGMD                        |
| 4    | <i>CNGA1</i>    | 5                                          | c.191delG                                    | p.G64fs        | rs527236058  | fs_del         | NA               | NA     | 0.0012 | NA                         | "DM" in HGMD                        |
| 4    | <i>CNGA1</i>    | 6                                          | c.265deC                                     | p.L89fs        | rs749012133  | fs_del         | NA               | NA     | 0.0012 | NA                         | "DM" in HGMD                        |
| 5    | <i>PDE6A</i>    | 1                                          | c.166G>T                                     | p.E56X         | rs772613637  | stopgain       | NA               | NA     | NA     | NA                         | likely pathogenic in ACMG guideline |
| 6    | <i>EYS</i>      | 11                                         | c.1750G>T                                    | p.E584X        | rs527236072  | stopgain       | NA               | NA     | NA     | NA                         | "DM" in HGMD                        |
| 6    | <i>EYS</i>      | 15                                         | c.2380C>T                                    | p.R794X        | rs371032798  | stopgain       | <0.0001          | NA     | NA     | NA                         | "DM" in HGMD                        |
| 6    | <i>EYS</i>      | 16                                         | c.2528G>A                                    | p.G843E        | rs74419361   | missense       | <0.0001          | 0.0014 | 0.022  | 4/5                        | "DM" in HGMD                        |
| 6    | <i>EYS</i>      | 23                                         | c.3489T>A                                    | p.N1163K       | rs150951106  | missense       | 0.0007           | 0.0018 | 0.0054 | 3/5                        | "DM?" in HGMD                       |
| 6    | <i>EYS</i>      | 25                                         | c.3809T>G                                    | p.V1270G       | rs368856942  | missense       | <0.0001          | 0.0004 | 0.0045 | 1/5                        | "DM?" in HGMD                       |
| 6    | <i>EYS</i>      | 26                                         | c.4891A>G                                    | p.K1633E       | rs77523865   | missense       | 0.0001           | 0.0002 | 0.0021 | 1/5                        | "DM" in HGMD                        |
| 6    | <i>EYS</i>      | 26                                         | c.4957dupA                                   | p.S1653fs      | rs527236065  | fs_del         | <0.0001          | NA     | 0.0021 | NA                         | "DM" in HGMD                        |
| 6    | <i>EYS</i>      | 28                                         | c.5847C>A                                    | p.Y1949X       | -            | stopgain       | NA               | NA     | NA     | NA                         | likely pathogenic in ACMG guideline |
| 6    | <i>EYS</i>      | 32                                         | c.6557G>A                                    | p.G2186E       | rs527236068  | missense       | <0.0001          | NA     | NA     | 3/5                        | "DM" in HGMD                        |
| 6    | <i>EYS</i>      | 39                                         | c.7609G>A                                    | p.A2537T       | rs189406424  | missense       | 0.0002           | 0.0018 | 0.005  | 1/5                        | "DM?" in HGMD                       |
| 6    | <i>EYS</i>      | 39                                         | c.7613delC                                   | p.P2538fs      | -            | fs_del         | NA               | NA     | NA     | NA                         | "DM" in HGMD                        |
| 6    | <i>EYS</i>      | 39                                         | c.7665_7666del                               | p.2555_2556del | rs368440268  | fs_del         | NA               | NA     | NA     | NA                         | "DM" in HGMD                        |
| 6    | <i>EYS</i>      | 41                                         | c.7919G>A                                    | p.W2640X       | rs527236066  | stopgain       | <0.0001          | NA     | NA     | NA                         | "DM" in HGMD                        |
| 6    | <i>EYS</i>      | 43                                         | 6 kb deletion including the whole of exon 42 | p.2756fs       | -            | gross deletion | NA               | NA     | NA     | NA                         | gross deletion/insertion            |
| 6    | <i>EYS</i>      | 43                                         | c.8268delC                                   | p.S2756fs      | rs753998034  | fs_del         | NA               | NA     | NA     | NA                         | likely pathogenic in ACMG guideline |
| 6    | <i>EYS</i>      | 43                                         | c.8268_8272del                               | p.2756_2758del | -            | fs_del         | <0.0001          | NA     | NA     | NA                         | likely pathogenic in ACMG guideline |
| 6    | <i>EYS</i>      | 43                                         | c.8650T>C                                    | p.C2884R       | -            | missense       | NA               | NA     | NA     | 4/5                        | "DM" in HGMD                        |
| 6    | <i>EYS</i>      | 43                                         | c.8805C>A                                    | p.Y2935X       | rs527236067  | stopgain       | <0.0001          | NA     | 0.0029 | NA                         | "DM" in HGMD                        |
| 6    | <i>EYS</i>      | 43                                         | c.8860T>C                                    | p.F2954L       | rs79036642   | missense       | 0.0002           | 0.0008 | 0.0008 | 1/5                        | "DM" in HGMD                        |
| 6    | <i>EYS</i>      | 43                                         | c.8868delT                                   | p.T2956fs      | -            | fs_del         | NA               | NA     | NA     | NA                         | likely pathogenic in ACMG guideline |
| 6    | <i>MAK</i>      | 15                                         | c.1825G>T                                    | p.O609X        | -            | stopgain       | NA               | NA     | NA     | NA                         | likely pathogenic in ACMG guideline |
| 6    | <i>TULP1</i>    | 12                                         | c.1145T>C                                    | p.F382S        | rs121909076  | missense       | <0.0001          | NA     | 0.0008 | 5/5                        | "DM" in HGMD                        |
| 8    | <i>RPL11</i>    | 2                                          | c.324_325msT                                 | p.P109fs       | rs753986463  | fs_ins         | 0.0019           | NA     | 0.0167 | NA                         | "DM" in HGMD                        |
| 8    | <i>RPL11</i>    | 4                                          | c.3026_3029del                               | p.I009_1010del | -            | fs_del         | NA               | NA     | NA     | NA                         | likely pathogenic in ACMG guideline |
| 8    | <i>RPI1</i>     | 4                                          | c.2143C>T                                    | p.Q715X        | -            | stopgain       | NA               | NA     | NA     | NA                         | likely pathogenic in ACMG guideline |
| 8    | <i>RPI1</i>     | 4                                          | c.4052_4053ms328                             | p.Y1352A fsX9  | -            | fs_ins         | NA               | NA     | NA     | NA                         | likely pathogenic in ACMG guideline |
| 8    | <i>RPI1</i>     | 4                                          | c.4196delG                                   | p.C1399fs      | rs201839635  | fs_del         | <0.0001          | NA     | NA     | NA                         | "DM" in HGMD                        |
| 8    | <i>RPI1</i>     | 4                                          | c.5797C>T                                    | p.R1933X       | rs1180031911 | stopgain       | 0.0002           | 0.0004 | 0.0033 | NA                         | likely pathogenic in ACMG guideline |
| 8    | <i>RPI1</i>     | 4                                          | c.6353G>A                                    | p.S2118N       | rs753732597  | missense       | <0.0001          | NA     | NA     | 1/5                        | "DM" in HGMD                        |
| 17   | <i>PRPF8</i>    | 36                                         | c.5792C>T                                    | p.T1931M       | -            | missense       | NA               | NA     | NA     | 5/5                        | "DM?" in HGMD                       |
| 17   | <i>PRPF8</i>    | 43                                         | c.6926A>C                                    | p.H2309P       | rs121434236  | missense       | NA               | NA     | NA     | 5/5                        | "DM" in HGMD                        |
| 17   | <i>PRPF8</i>    | 43                                         | c.6929G>A                                    | p.R2310K       | rs121434238  | missense       | NA               | NA     | NA     | 5/5                        | "DM" in HGMD                        |
| 19   | <i>REEP6</i>    | 3                                          | c.230_233del                                 | p.77_78del     | rs781429331  | fs_del         | NA               | NA     | NA     | NA                         | likely pathogenic in ACMG guideline |
| 19   | <i>PRPF31</i>   | 3                                          | c.280_281del                                 | p.94_94del     | rs759026615  | fs_del         | <0.0001          | NA     | NA     | NA                         | pathogenic in ACMG guideline        |
| 19   | <i>PRPF31</i>   | 70 kb deletion including the whole exon1&2 | -                                            | gross deletion | -            | gross deletion | NA               | NA     | NA     | NA                         | gross deletion/insertion            |
| 19   | <i>PRPF31</i>   | 4                                          | c.316G>T                                     | p.E106X        | -            | stopgain       | NA               | NA     | NA     | NA                         | likely pathogenic in ACMG guideline |
| X    | <i>RPGR</i>     | 7                                          | c.764C>T                                     | p.T2551        | -            | missense       | NA               | NA     | NA     | 5/5                        | "DM" in HGMD                        |
| X    | <i>RPGR</i>     | 8                                          | c.793dupA                                    | p.T265fs       | -            | fs_ins         | NA               | NA     | NA     | NA                         | likely pathogenic in ACMG guideline |
| X    | <i>RPGR</i>     | 14                                         | c.1665deA                                    | p.E555fs       | -            | fs_del         | NA               | NA     | NA     | NA                         | likely pathogenic in ACMG guideline |
| X    | <i>RPGR</i>     | 15                                         | c.2236_2237del                               | p.746_746del   | -            | fs_del         | NA               | NA     | NA     | NA                         | likely pathogenic in ACMG guideline |
| X    | <i>RPGR</i>     | 15                                         | c.2357_2358msGAGAGAA                         | p.K786fs       | -            | fs_ins         | NA               | NA     | NA     | NA                         | likely pathogenic in ACMG guideline |
| X    | <i>RPGR</i>     | 15                                         | c.2706_2707del                               | p.902_903del   | -            | fs_del         | NA               | NA     | NA     | NA                         | likely pathogenic in ACMG guideline |
| X    | <i>RP2</i>      | 1                                          | c.28A>T                                      | p.K10X         | -            | stopgain       | NA               | NA     | NA     | NA                         | likely pathogenic in ACMG guideline |

fs\_del : frameshift deletion, fs\_ins : frameshift insertion, NA : not applicable

## Supplementary Table 4.

### Details of possibly solved patients, causative variants and VUS.

NOTICE : The variants need to be replicated in further ethnic-matched study for confirmation of pathogenicity before the patients are recruited to any available clinical trials of gene therapies.

| SampleID | Sex | Age of onset       | First subjective symptom       | Age of first visit to our institute | VA at first visit to our institute | Hereditary trait indicated from pedigree tree | Gene            | Genotype        | Variant 1            | Variant 2                     | Comment on phenotype                             |
|----------|-----|--------------------|--------------------------------|-------------------------------------|------------------------------------|-----------------------------------------------|-----------------|-----------------|----------------------|-------------------------------|--------------------------------------------------|
| RPKT0343 | F   | 40                 | p/o at occasional medical exam | 40                                  | 1.5/1.5                            | inconclusive                                  | <i>CNGA1</i>    | homo            | c.41A>T:p.Q14L       | c.41A>T:p.Q14L                | atypical phenotype(dystrophy only in nasal area) |
| RPKT0354 | F   | 55                 | decreased VA                   | 82                                  | 1.2/1.2                            | inconclusive                                  | <i>IFT140</i>   | compound hetero | c.2542C>T:p.R848C    | c.3018_3019del:p.1006_1007del | n.p.                                             |
| RPKT0368 | F   | 13                 | night blindness                | 13                                  | 1.5/1.5                            | sporadic                                      | <i>CACNA1F</i>  | compound hetero | c.3334G>T:p.E1112X   | c.3346T>G;p.F1116V            | n.p.                                             |
| RPKT0371 | F   | in her 7th decades | night blindness                | 75                                  | 0.4/0.5                            | inconclusive                                  | <i>EYS</i>      | compound hetero | c.2528G>A:p.G843E    | c.525_527del:p.175_176del     | n.p.                                             |
| RPKT0391 | M   | 20                 | night blindness                | 46                                  | 0.7/1.0                            | inconclusive                                  | <i>RHO</i>      | hetero          | c.539C>T:p.P180L     | -                             | combined with CSC                                |
| RPKT0494 | M   | 61                 | constriction of VF             | 61                                  | 1.0/1.2                            | AR                                            | <i>GPR98</i>    | compound hetero | c.940G>A:p.A314T     | c.3046G>A:p.E1016K            | atypical phenotype(without pigmentation)         |
| RPKT0503 | M   | 60                 | decreased VA                   | 63                                  | 1.2/1.2                            | sporadic                                      | <i>GUCY2D</i>   | hetero          | c.162C>G:p.F54L      | -                             | n.p.                                             |
| RPKT0508 | M   | 10                 | p/o at occasional medical exam | 18                                  | SL-/0.5                            | sporadic                                      | <i>SNRNP200</i> | hetero          | c.2594G>A:p.G865D    | -                             | combined with right eye ECD and RD               |
| RPKT0520 | M   | childhood          | night blindness                | 41                                  | 0.9/0.7                            | AR                                            | <i>PDE6B</i>    | hetero          | c.1514A>C:p.H505P    | -                             | n.p.                                             |
| RPKT0547 | F   | 59                 | night blindness                | 68                                  | 0.2/0.2                            | sporadic                                      | <i>ZNF408</i>   | homo            | c.377G>A:p.S126N     | c.377G>A:p.S126N              | n.p.                                             |
| RPKT0550 | F   | in her 4th decades | night blindness                | 59                                  | 0.6/0.5                            | sporadic                                      | <i>TOPORS</i>   | hetero          | c.2078G>T:p.R693I    | -                             | n.p.                                             |
| RPKT0555 | M   | adolescence        | night blindness                | 26                                  | 0.7/0.7                            | AR                                            | <i>CLN3</i>     | homo            | c.1007C>A:p.S336Y    | c.1007C>A:p.S336Y             | atypical phenotype(without pigmentation)         |
| RPKT0568 | F   | in his 3rd decades | night blindness                | 56                                  | 0.2/0.3                            | sporadic                                      | <i>MAK</i>      | compound hetero | c.512T>C:p.L171S     | c.1825C>T:p.Q609X             | n.p.                                             |
| RPKT0569 | M   | 52                 | p/o at occasional medical exam | 59                                  | 1.0/1.0                            | AR                                            | <i>USH2A</i>    | homo            | c.10967T>C:p.F3656S  | c.10967T>C:p.F3656S           | n.p.                                             |
| RPKT0610 | F   | 65                 | decreased VA                   | 72                                  | 0.01/0.3                           | sporadic                                      | <i>CRB1</i>     | hetero          | c.3131C>T:p.P1044L   | -                             | atypical phenotype(mainly paravenous pigment)    |
| RPKT0611 | M   | 51                 | p/o at occasional medical exam | 54                                  | 1.5/1.5                            | sporadic                                      | <i>USH2A</i>    | compound hetero | c.12863C>A:p.P4288Q  | c.12863C>A:p.P4288Q           | n.p.                                             |
| RPKT0614 | M   | 45                 | night blindness                | 56                                  | 1.2/1.2                            | sporadic                                      | <i>USH2A</i>    | compound hetero | c.13847G>T:p.G4616V  | c.15355C>T:p.R5119W           | n.p.                                             |
| RPKT0615 | F   | childhood          | night blindness                | 43                                  | 0.4/0.4                            | sporadic                                      | <i>USH2A</i>    | compound hetero | c.14286C>G:p.N4762K  | c.14243C>T:p.S4748F           | n.p.                                             |
| RPKT0621 | M   | 52                 | constriction of VF             | 58                                  | 0.4/0.8                            | AR                                            | <i>PRPF8</i>    | hetero          | c.6345C>G:p.I2115M   | -                             | n.p.                                             |
| RPKT0632 | M   | not recorded       | not recorded                   | 70                                  | 0.1/0.03                           | inconclusive                                  | <i>SNRNP200</i> | hetero          | c.1532A>C:p.N511T    | -                             | n.p.                                             |
| RPKT0647 | M   | 20                 | night blindness                | 21                                  | 1.2/1.5                            | sporadic                                      | <i>EYS</i>      | compound hetero | c.4957dupA:p.S1653fs | c.6563T>C:p.I2188T            | n.p.                                             |
| RPKT0650 | F   | childhood          | night blindness                | 54                                  | 0.3/0.3                            | sporadic                                      | <i>FLVCR1</i>   | compound hetero | c.368T>G:p.F123C     | c.733A>G;p.N245D              | n.p.                                             |

p/o: pointed out, VA : visual acuity, VF: visual field, n.p.: nothing particular, CSC: central serous chorioretinopathy, ECD: endothelial corneal dystrophy, RD: retinal detachment



## Supplementary Table 5.

### Details of candidate causative variants evaluated as VUS in the current study.

NOTICE : These variants need to be replicated in further ethnic-matched study for confirmation of pathogenicity.

| Chr. | Gene            | Exon | Nucleotide change | Protein change | rsID         | Variant type | MAF in databases |        |        | No. of damaging prediction |
|------|-----------------|------|-------------------|----------------|--------------|--------------|------------------|--------|--------|----------------------------|
|      |                 |      |                   |                |              |              | gnomAD           | 1000G  | HGVD   |                            |
| 1    | <i>CRB1</i>     | 9    | c.3131C>T         | p.P1044L       | -            | missense     | NA               | NA     | NA     | 3/5                        |
| 1    | <i>FLVCR1</i>   | 1    | c.368T>G          | p.F123C        | -            | missense     | NA               | NA     | NA     | 4/5                        |
| 1    | <i>FLVCR1</i>   | 1    | c.733A>G          | p.N245D        | -            | missense     | NA               | NA     | NA     | 5/5                        |
| 1    | <i>USH2A</i>    | 56   | c.10967T>C        | p.F3656S       | -            | missense     | NA               | NA     | NA     | 4/5                        |
| 1    | <i>USH2A</i>    | 63   | c.12863C>A        | p.P4288Q       | -            | missense     | NA               | NA     | NA     | 5/5                        |
| 1    | <i>USH2A</i>    | 65   | c.14286C>G        | p.N4762K       | rs750368946  | missense     | <0.0001          | NA     | NA     | 4/5                        |
| 1    | <i>USH2A</i>    | 71   | c.15355C>T        | p.R5119W       | rs767137840  | missense     | 0.0001           | NA     | 0.0004 | 2/5                        |
| 2    | <i>SNRNP200</i> | 20   | c.2594G>A         | p.G865D        | -            | missense     | NA               | 0.0004 | NA     | 5/5                        |
| 2    | <i>SNRNP200</i> | 13   | c.1532A>C         | p.N511T        | -            | missense     | NA               | NA     | NA     | 5/5                        |
| 3    | <i>RHO</i>      | 3    | c.539C>T          | p.P180L        | -            | missense     | NA               | 0.0008 | NA     | 5/5                        |
| 4    | <i>PDE6B</i>    | 12   | c.1514A>C         | p.H505P        | -            | missense     | NA               | NA     | NA     | 4/5                        |
| 4    | <i>CNGA1</i>    | 4    | c.41A>T           | p.Q14L         | -            | missense     | NA               | NA     | 0.0004 | 0/5                        |
| 5    | <i>GPR98</i>    | 7    | c.940G>A          | p.A314T        | rs533540279  | missense     | <0.0001          | NA     | 0.0021 | 3/5                        |
| 5    | <i>GPR98</i>    | 17   | c.3046G>A         | p.E1016K       | -            | missense     | NA               | NA     | NA     | 5/5                        |
| 6    | <i>MAK</i>      | 7    | c.512T>C          | p.L171S        | -            | missense     | NA               | NA     | 0.0012 | 5/5                        |
| 6    | <i>EYS</i>      | 4    | c.525_527del      | p.E175del      | rs780433094  | nonfs_del    | 9.55E-05         | NA     | 0.0008 | NA                         |
| 6    | <i>EYS</i>      | 32   | c.6563T>C         | p.I2188T       | rs1562190751 | missense     | <0.0001          | NA     | NA     | 2/5                        |
| 9    | <i>TOPORS</i>   | 3    | c.2078G>T         | p.R693I        | -            | missense     | NA               | NA     | NA     | 3/5                        |
| 11   | <i>ZNF408</i>   | 3    | c.377G>A          | p.S126N        | rs536561101  | missense     | <0.0001          | 0.0002 | 0.0041 | 3/5                        |
| 16   | <i>IFT140</i>   | 20   | c.2542C>T         | p.R848C        | rs201384469  | missense     | 0.0003           | NA     | 0.0006 | 4/5                        |
| 16   | <i>CLN3</i>     | 14   | c.1007C>A         | p.S336Y        | rs761795794  | missense     | NA               | NA     | NA     | 4/5                        |
| 17   | <i>PRPF8</i>    | 39   | c.6345C>G         | p.I2115M       | -            | missense     | NA               | NA     | NA     | 4/5                        |
| 17   | <i>GUCY2D</i>   | 2    | c.162C>G          | p.F54L         | -            | missense     | NA               | NA     | NA     | 4/5                        |
| X    | <i>CACNA1F</i>  | 28   | c.3334G>T         | p.E1112X       | -            | stopgain     | NA               | NA     | NA     | NA                         |
| X    | <i>CACNA1F</i>  | 28   | c.3346T>G         | p.F1116V       | -            | missense     | NA               | NA     | NA     | 5/5                        |

nonfs\_del : nonframeshift deletion, NA : not applicable

# Supplementary Figure 1. Heterozygous deletion spanning exon 42 of *EYS*.

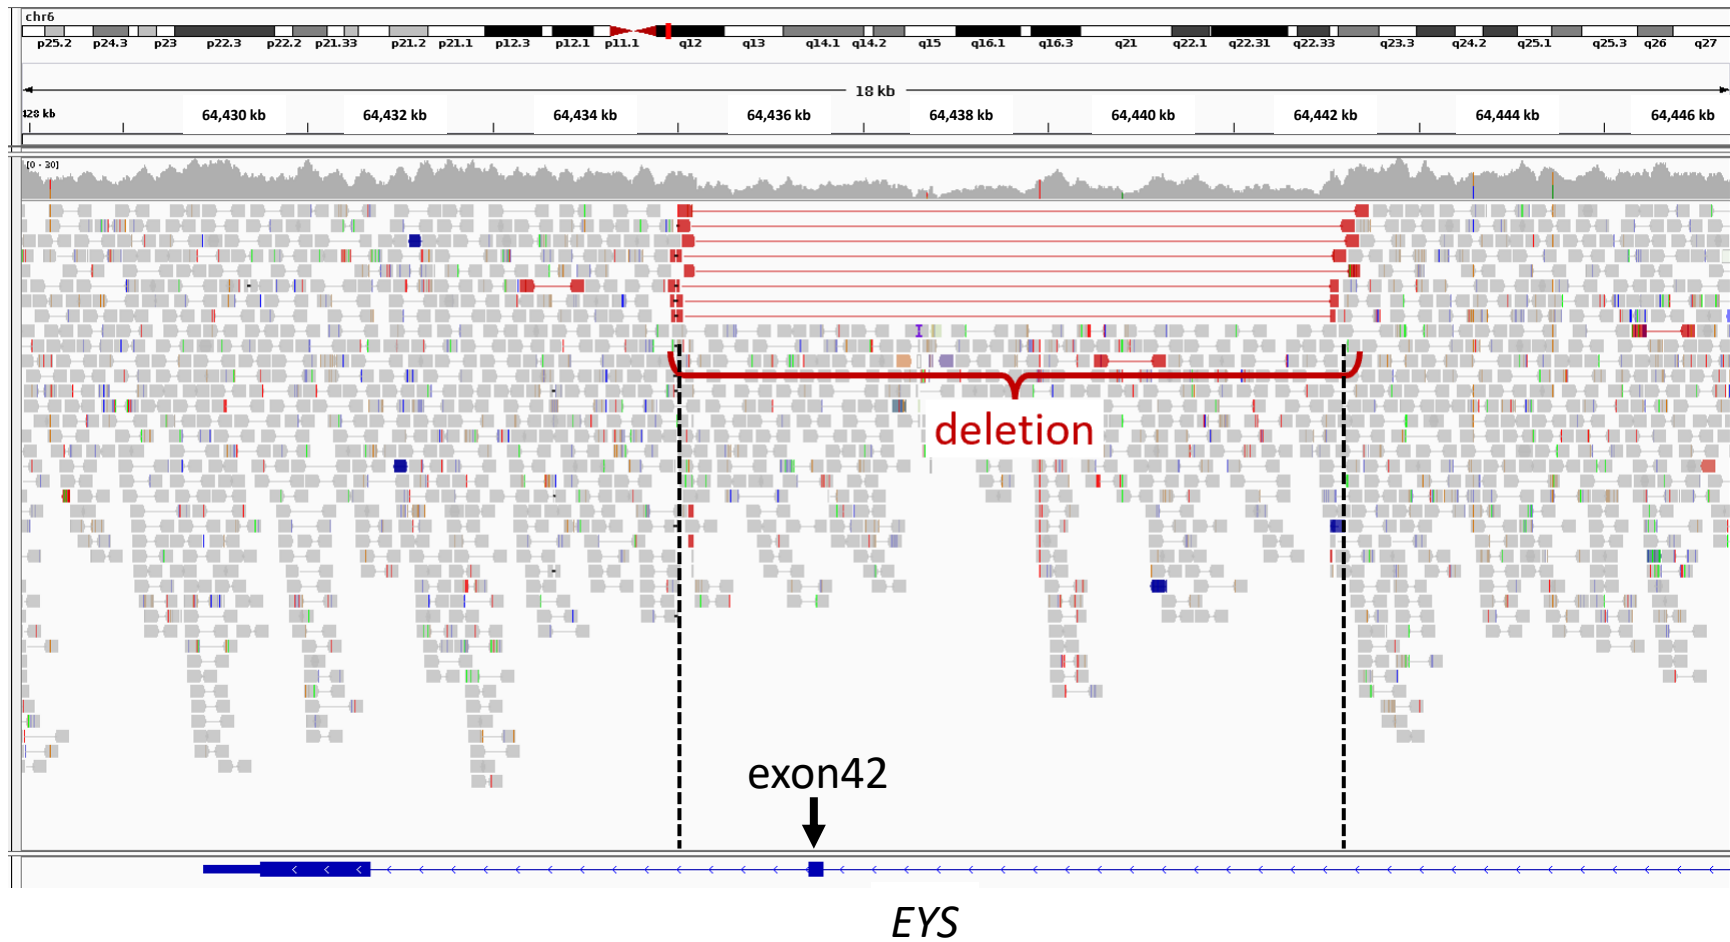

Read-depth analysis shows heterozygous large deletion (red) that includes all of exon 42 in patient with founder mutation c.4957dupA

## Supplementary Figure 2. Complex rearrangements including *PRPF31*.

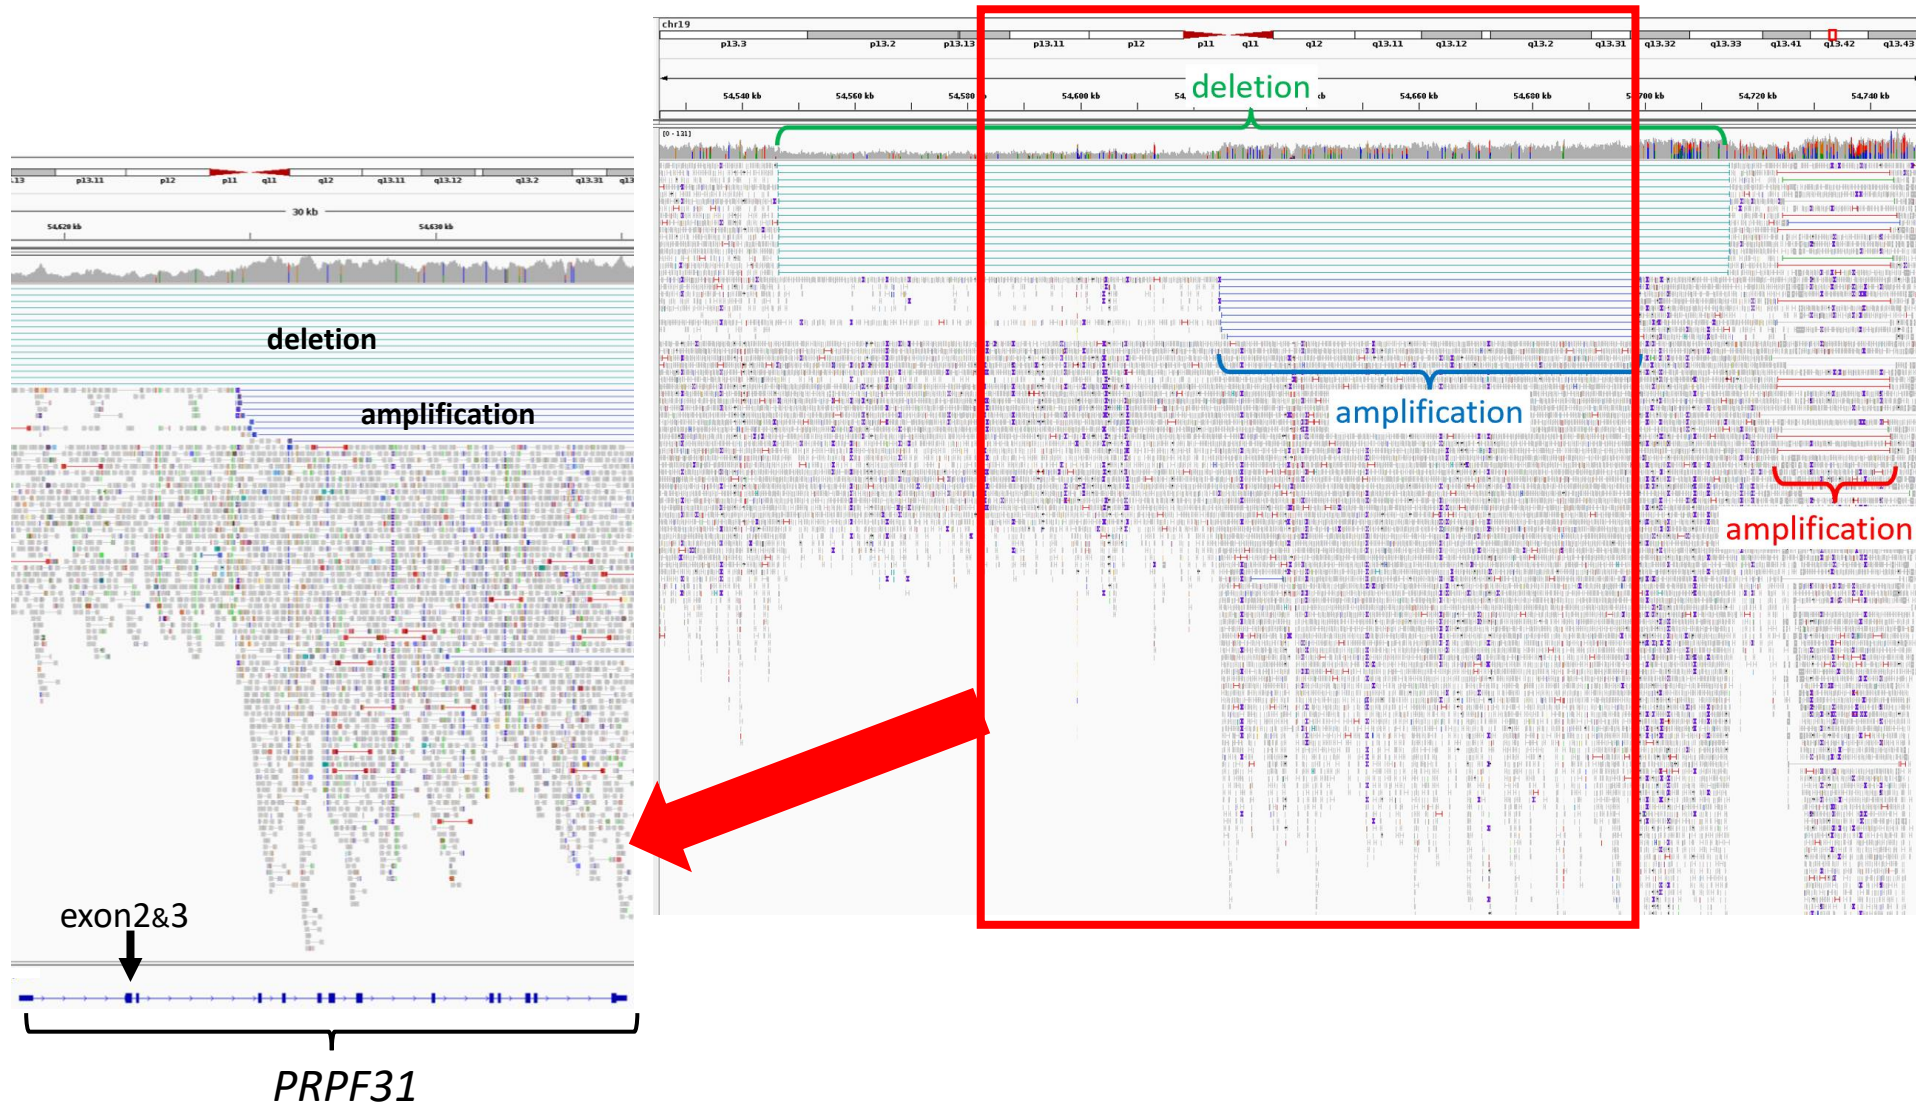

Read-depth analysis shows complex rearrangement on long arm of chromosome 19 comprising 160 kb deletion (green) including protein-coding exons 2 and 3 of *PRPF31* and two amplified regions (blue and red)

# Supplementary Figure 3.

## Atypical phenotype of patient possibly solved with VUS of *CNGA1*.

NOTICE : The patient's variants need to be replicated in further ethnic-matched study for confirmation of pathogenicity before any available clinical trials of gene therapies.

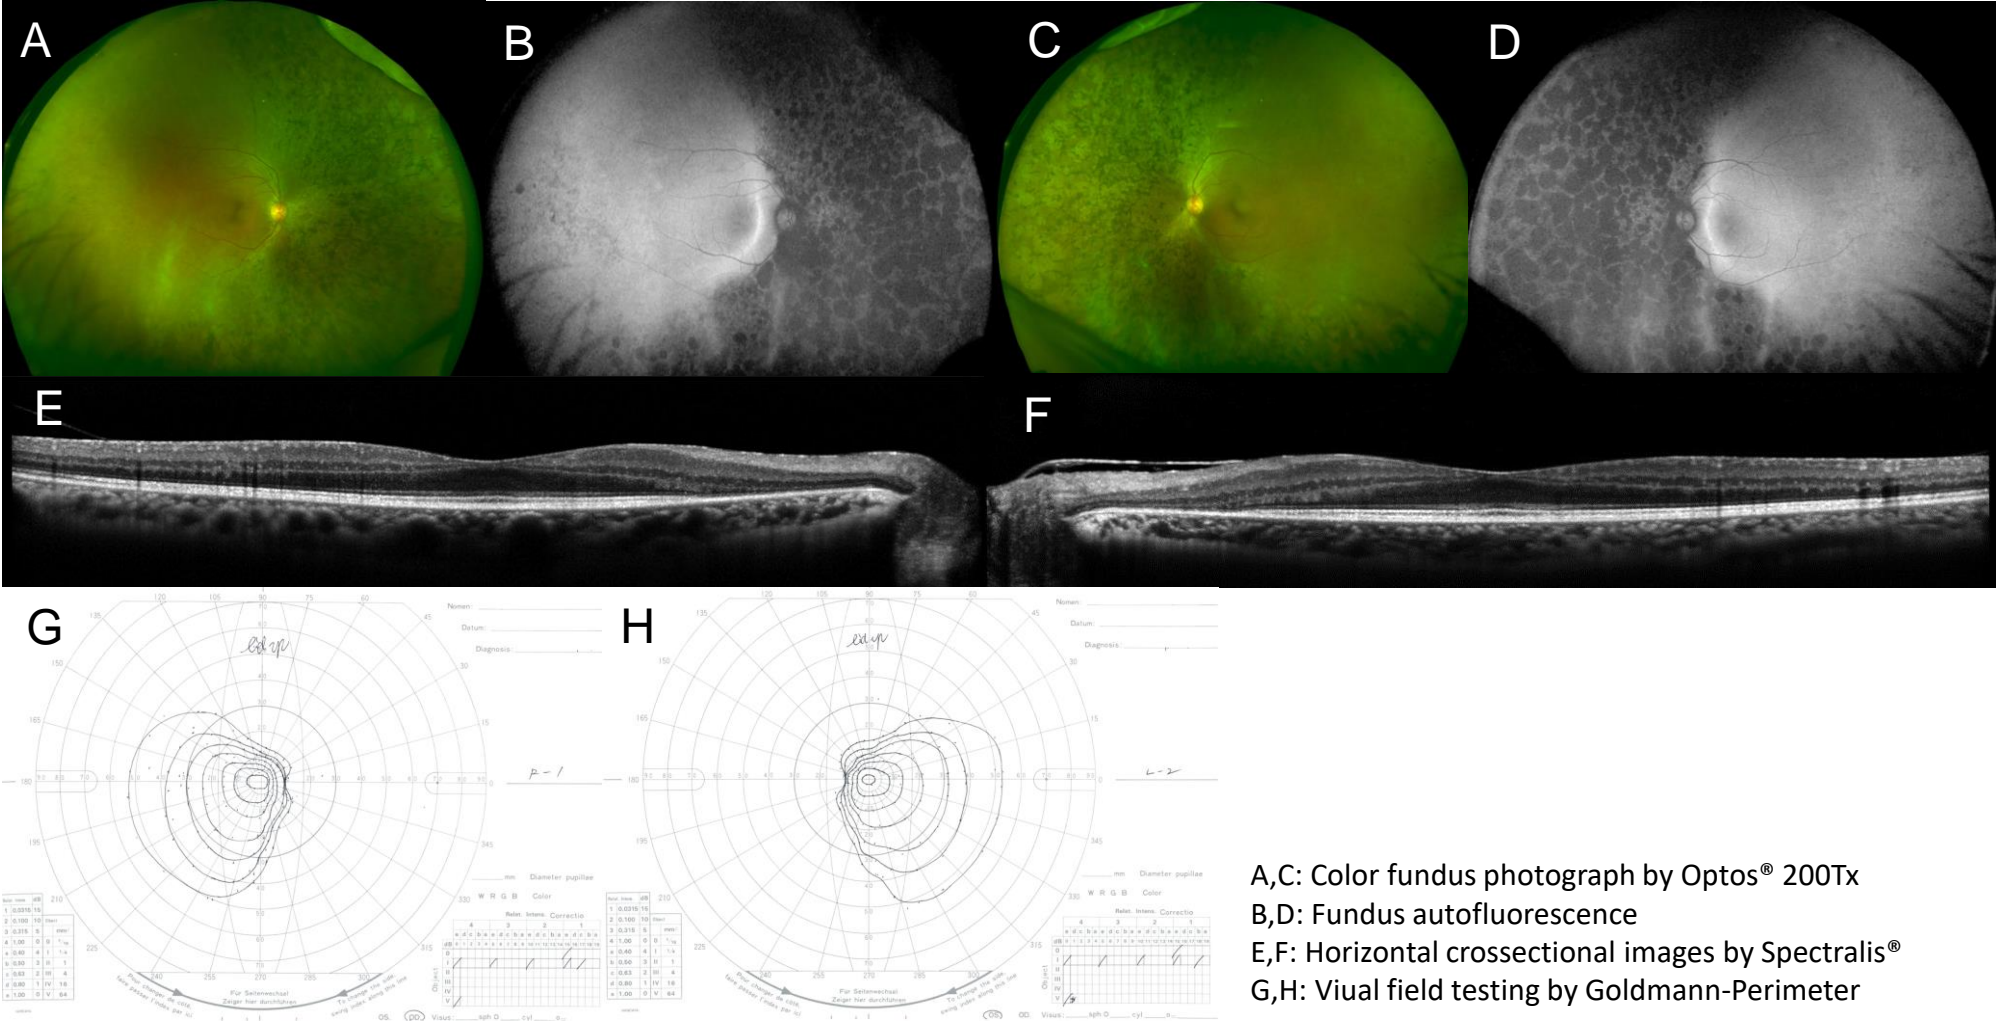

A,C: Color fundus photograph by Optos® 200Tx  
B,D: Fundus autofluorescence  
E,F: Horizontal crosssectional images by Spectralis®  
G,H: Visual field testing by Goldmann-Perimeter

## Supplementary Figure 4.

Atypical phenotype of patient possibly solved with VUS of *GPR98*.

NOTICE : The patient's variants need to be replicated in further ethnic-matched study for confirmation of pathogenicity before any available clinical trials of gene therapies.

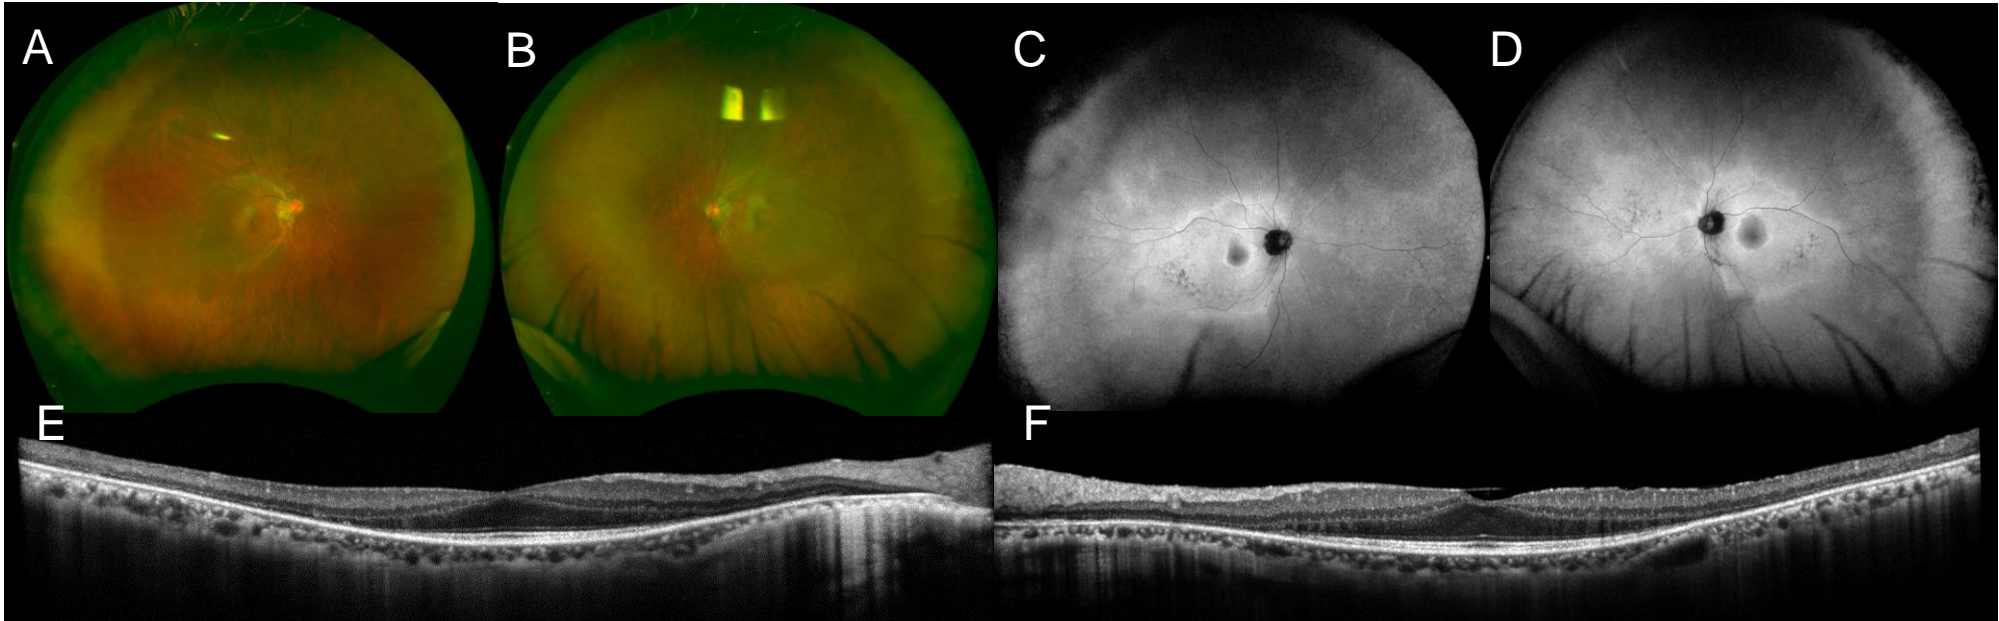

A,C: Color fundus photograph by Optos® 200Tx B,D: Fundus autofluorescence

E,F: Horizontal crosssectional images by Spectralis®

# Supplementary Figure 5.

## Atypical phenotype of patient possibly solved with VUS of *CRB1*.

NOTICE : The patient's variants need to be replicated in further ethnic-matched study for confirmation of pathogenicity before any available clinical trials of gene therapies.

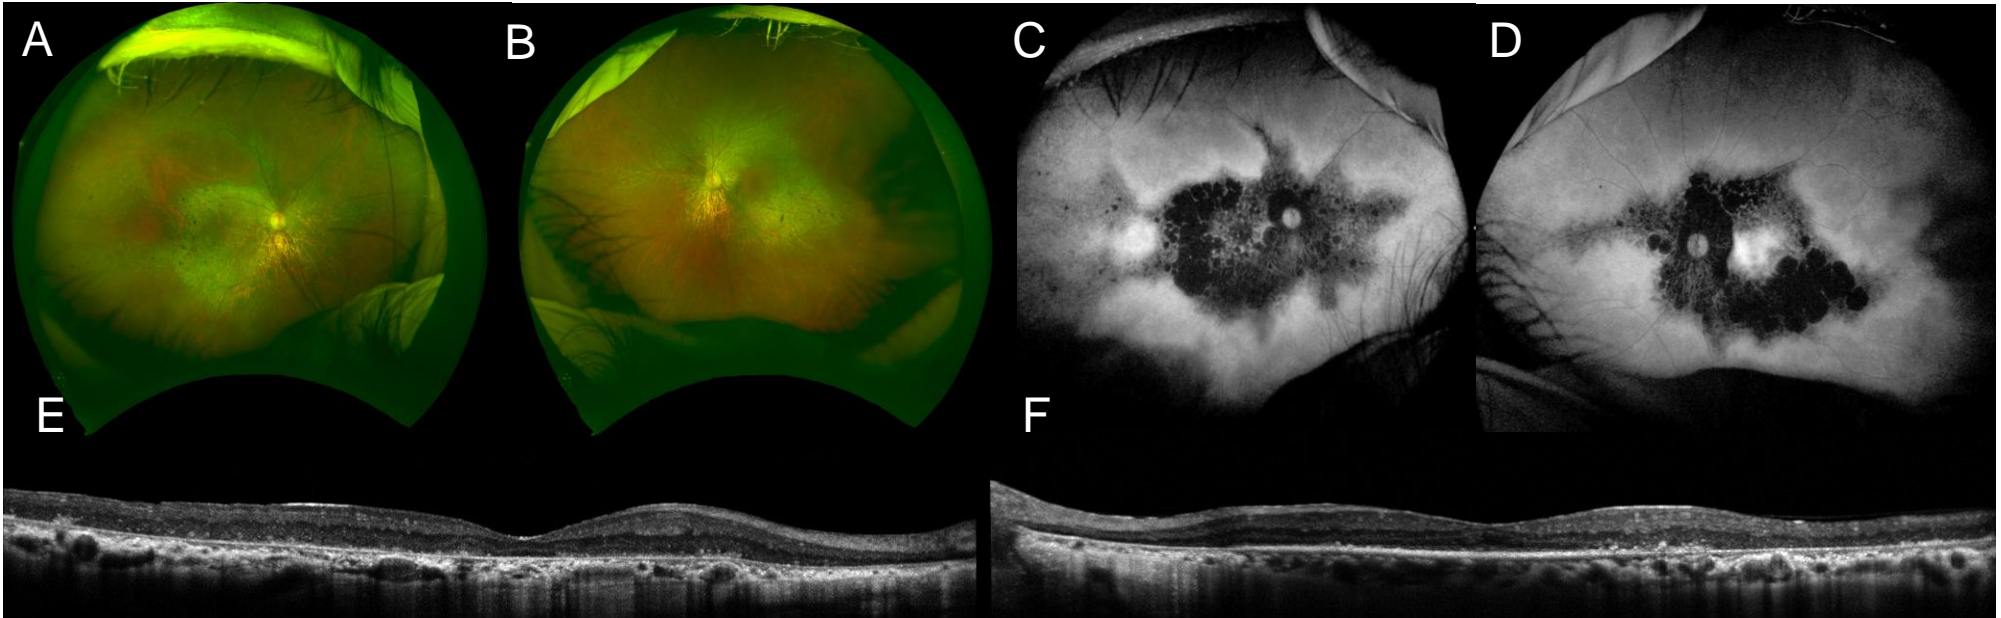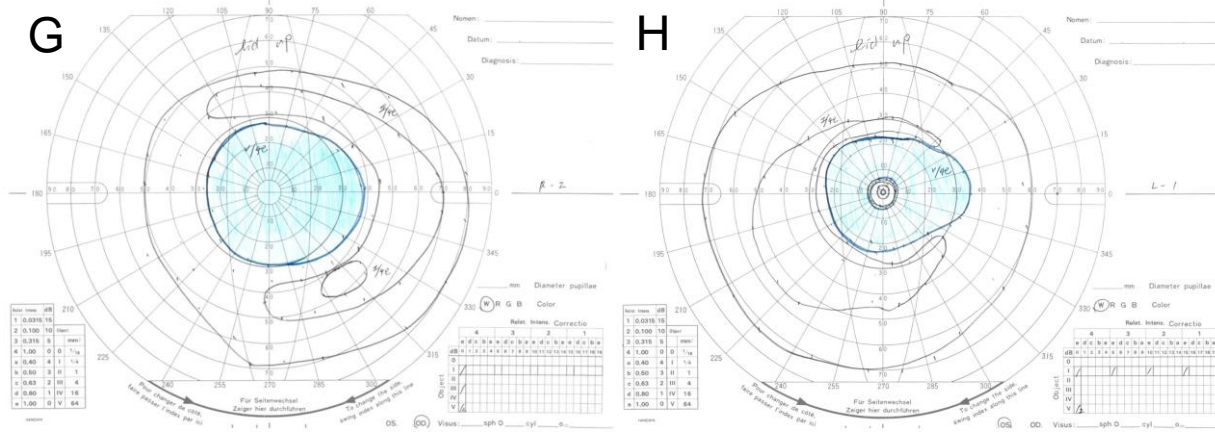

A,C: Color fundus photograph by Optos® 200Tx  
B,D: Fundus autofluorescence  
E,F: Horizontal cross-sectional images by Spectralis®  
G,H: Visual field testing by Goldmann-Perimeter

## Supplementary Figure 6.

Atypical phenotype of patient possibly solved with VUS of *CLN3*.

NOTICE : The patient's variants need to be replicated in further ethnic-matched study for confirmation of pathogenicity before any available clinical trials of gene therapies.

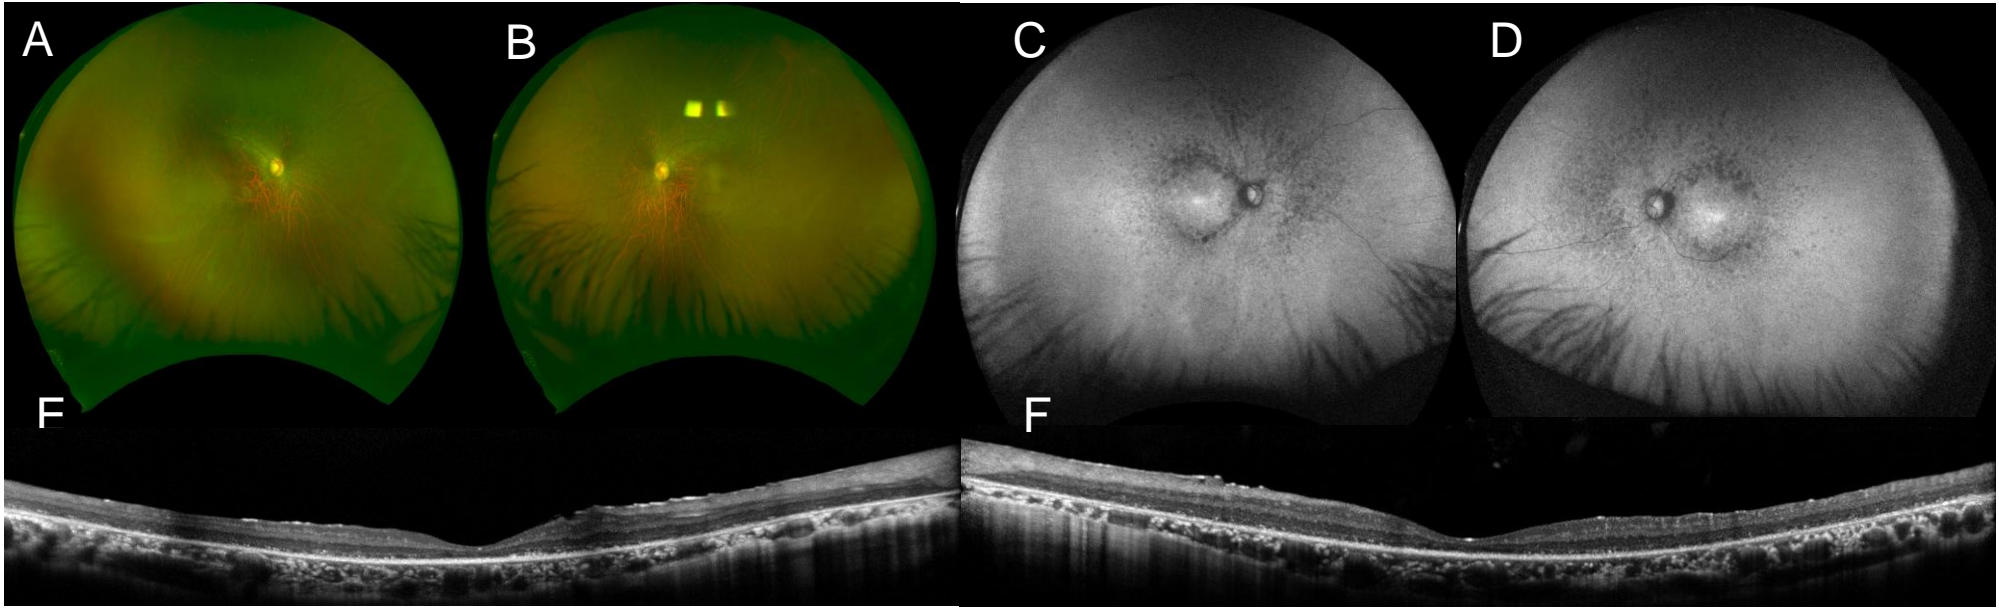

A,C: Color fundus photograph by Optos® 200Tx    B,D: Fundus autofluorescence

E,F: Horizontal crosssectional images by Spectralis®

# Supplementary Figure 7.

## Phenotype of the patient possibly solved with VUS of *GUCY2D*.

NOTICE : The patient's variants need to be replicated in further ethnic-matched study for confirmation of pathogenicity before any available clinical trials of gene therapies.

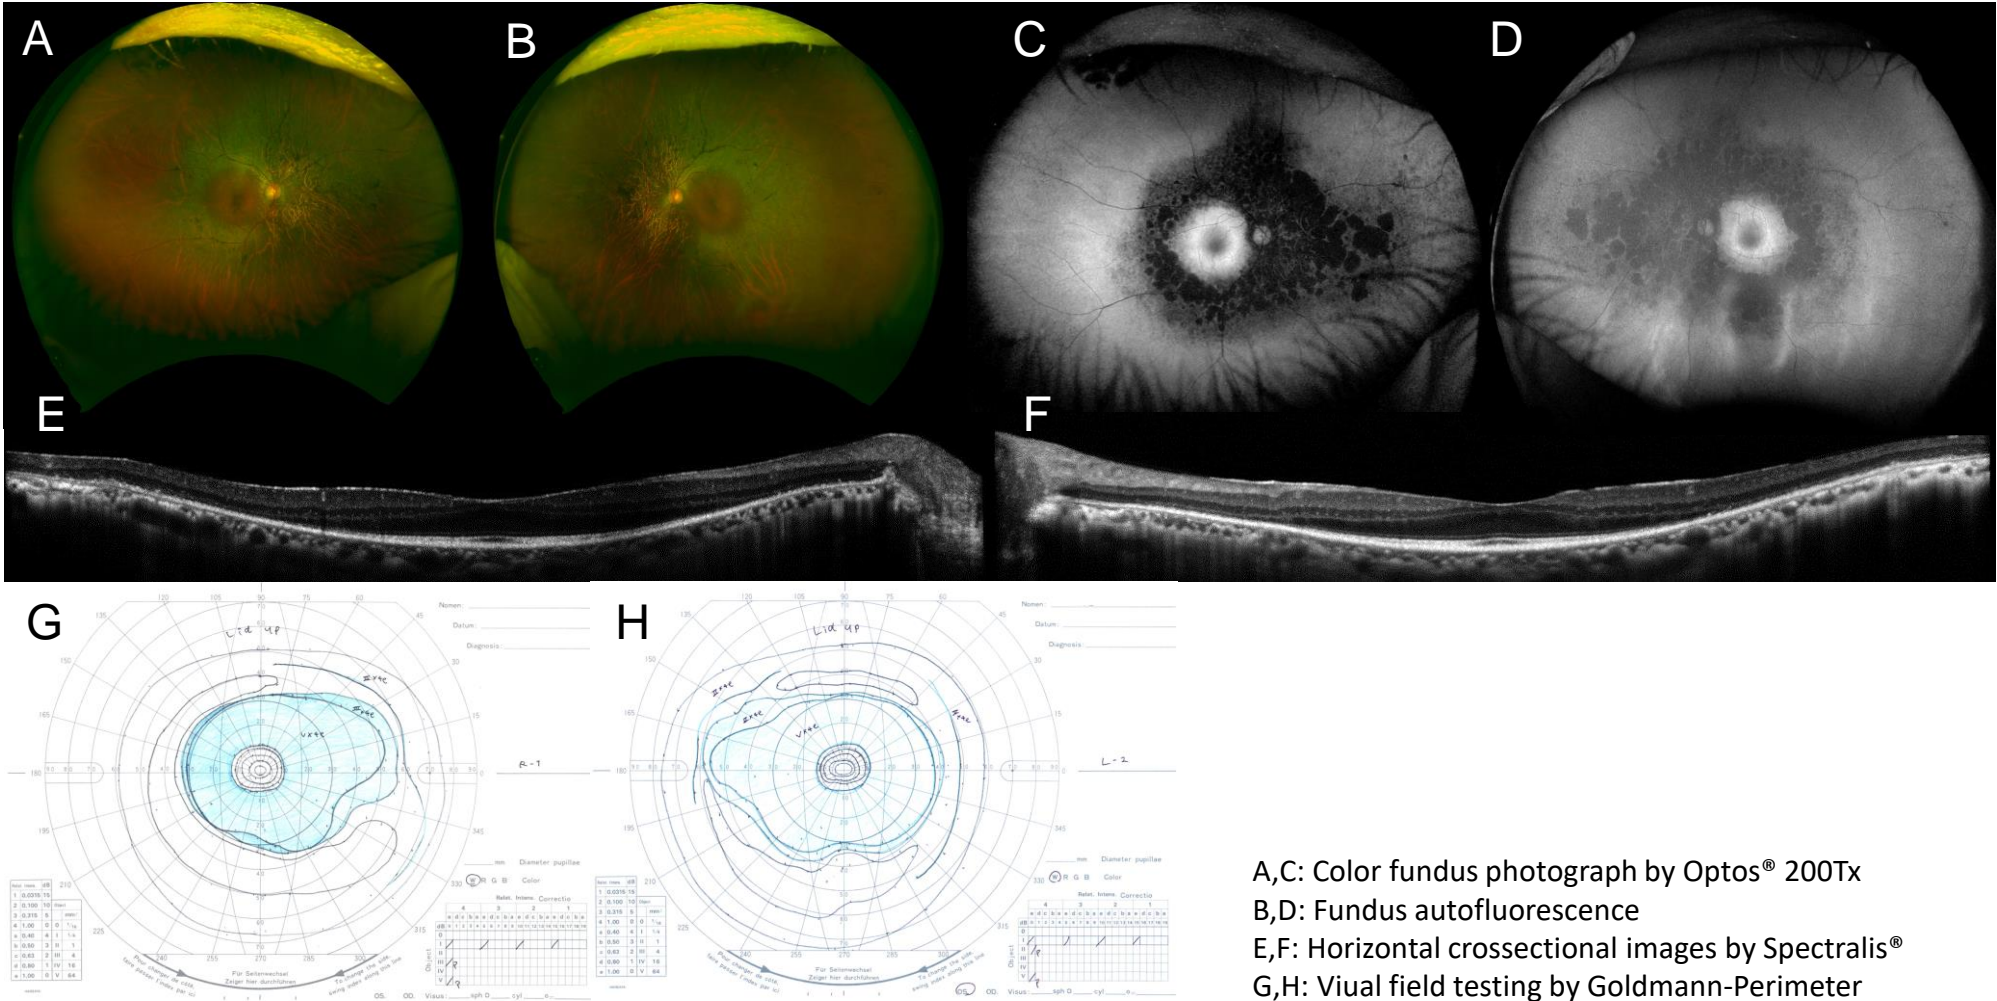

Supplement: 41598_2020_77558_MOESM1_ESM.pdf [file 41598_2020_77558_MOESM1_ESM.pdf]
